# Supplementary material for: Influence of the zeolite support on the catalytic properties of confined metal clusters: a periodic DFT study of O2 dissociation on Cun clusters in CHA
Source: Royal Society of Chemistry journal article supplement (doi:10.1039/d2cp04915e), 2022-01-01
Supplement: d2cp04915e1.pdf [file d2cp04915e1.pdf]

## Supporting Information

Influence of the zeolite support on the catalytic properties of confined metal clusters: a periodic DFT study of O<sub>2</sub> dissociation on Cu<sub>n</sub> clusters in CHA

*Mario Gallego, Avelino Corma and Mercedes Boronat\**

Instituto de Tecnología Química (UPV-CSIC), Universitat Politècnica de València –  
Consejo Superior de Investigaciones Científicas, Avda. de los Naranjos s/n, 46022  
Valencia, Spain.

boronat@itq.upv.es

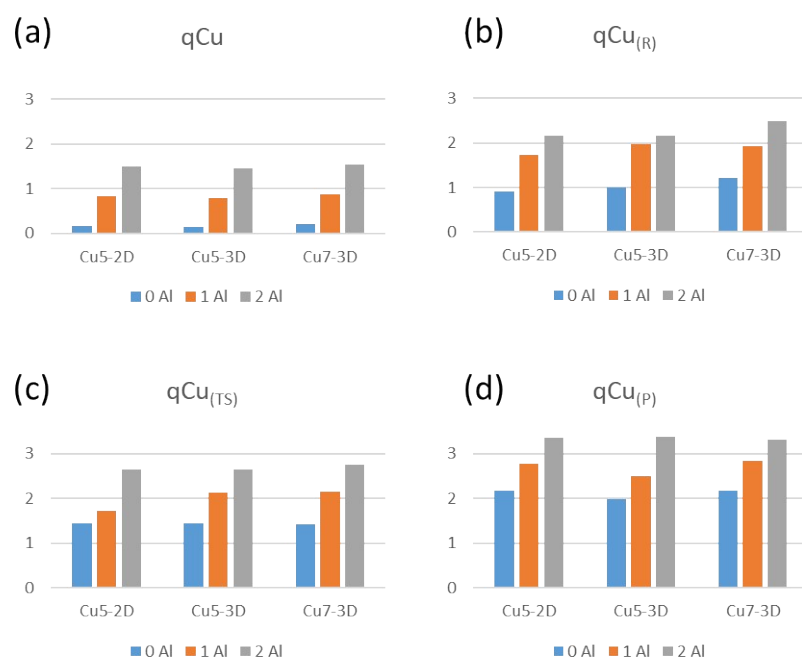

**Figure S1.** Total atomic charge on Cu<sub>n</sub> clusters stabilized in CHA zeolite  $q_{Cu}$  (a) and in reactant R (b) transition state TS (c) and product P (d) structures involved in O<sub>2</sub> dissociation.

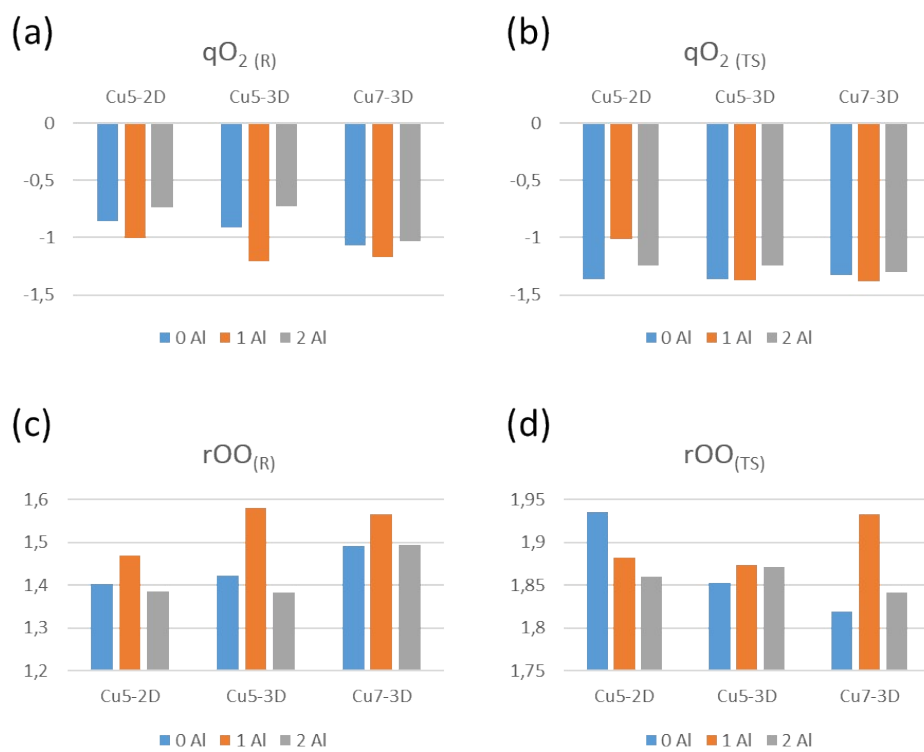

**Figure S2.** Total atomic charge on adsorbed  $O_2$ ,  $qO_2$ , in reactant R (a) and transition state TS (b) structures, and optimized O-O distances  $rOO$  in reactant R (c) and transition state TS (d) structures involved in  $O_2$  dissociation.

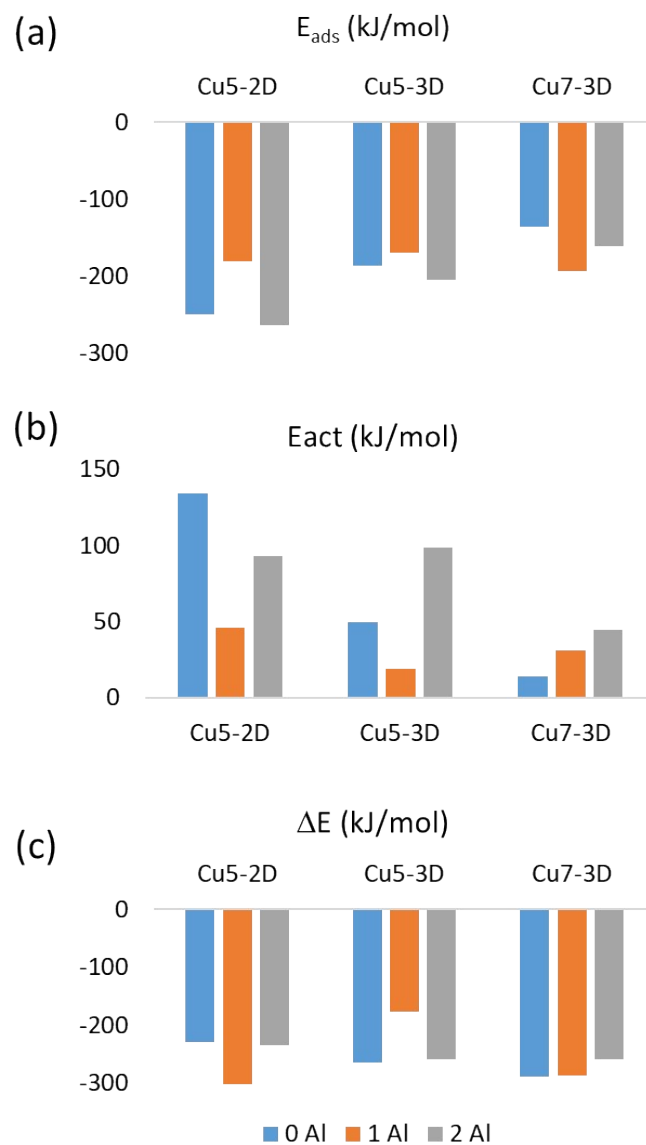

**Figure S3.** Calculated (a) adsorption  $E_{\text{ads}}$ , (b) activation  $E_{\text{act}}$  and (c) reaction  $\Delta E$  energies (in kJ/mol) for O<sub>2</sub> dissociation on Cu<sub>n</sub> clusters stabilized in CHA.

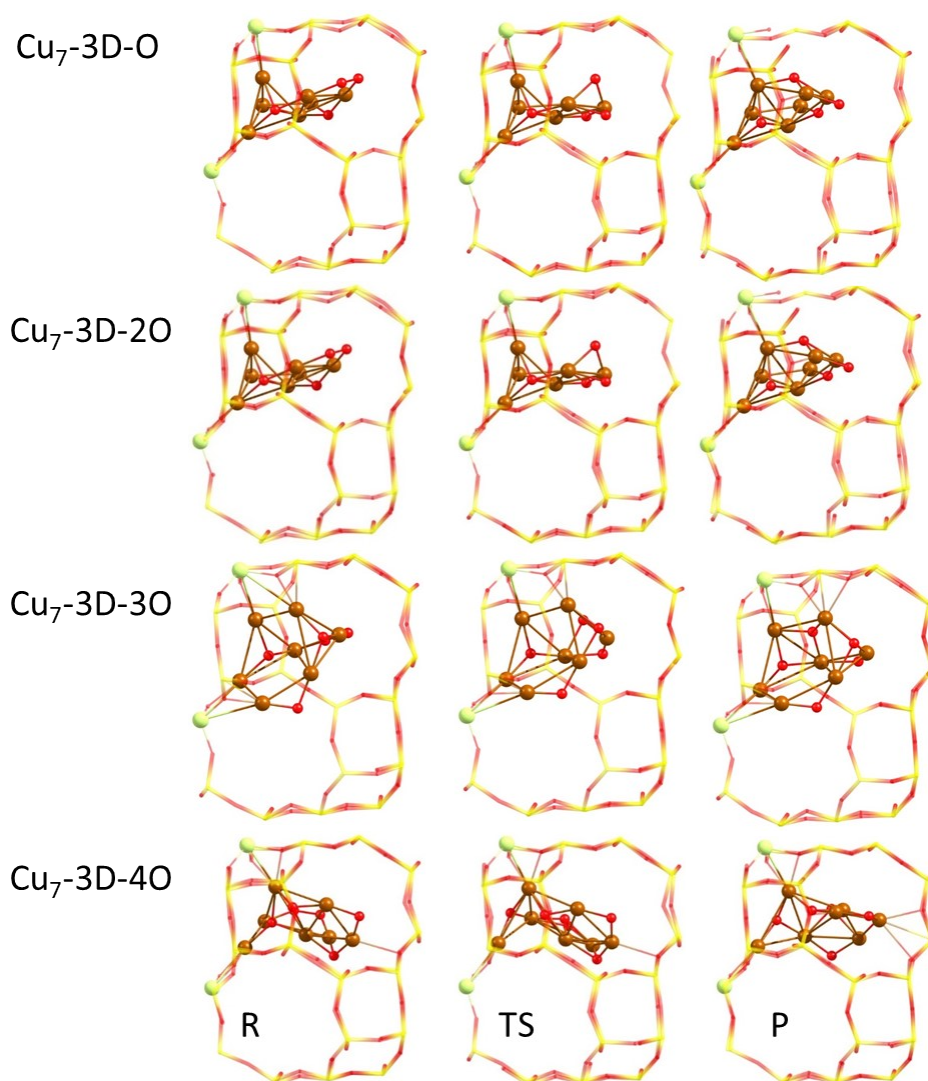

**Figure S4.** Optimized structures of reactant R, transition state TS and product P of  $O_2$  dissociation reaction on  $Cu_7$ -3D-O,  $Cu_7$ -3D-2O,  $Cu_7$ -3D-3O and  $Cu_7$ -3D-4O clusters confined within CHA models with 2 framework Al atoms. Si and O are depicted as red and yellow wires, Cu and Al are depicted as brown and light green balls.
